Retraction

## Retraction: Sodium fluoride induces apoptosis in mouse splenocytes by activating ROS-dependent NF- $\kappa$ B signaling

Huidan Deng<sup>1,\*</sup>, Ping Kuang<sup>1,\*</sup>, Hengmin Cui<sup>1,2</sup>, Qin Luo<sup>1</sup>, Huan Liu<sup>1</sup>, Yujiao Lu<sup>1</sup>, Jing Fang<sup>1,2</sup>, Zhicai Zuo<sup>1,2</sup>, Junliang Deng<sup>1,2</sup>, Yinglun Li<sup>1,2</sup>, Xun Wang<sup>1,2</sup> and Ling Zhao<sup>1,2</sup>

<sup>1</sup>College of Veterinary Medicine, Sichuan Agricultural University, Wenjiang, Chengdu 611130, China

<sup>2</sup>Key Laboratory of Animal Diseases and Environmental Hazards of Sichuan Province, Sichuan Agriculture University, Wenjiang, Chengdu 611130, China

\*These authors contributed equally to this work

**Published:** April 17, 2026

**Copyright:** © 2026 Deng et al. This is an open access article distributed under the terms of the [Creative Commons Attribution License](#) (CC BY 4.0), which permits unrestricted use, distribution, and reproduction in any medium, provided the original author and source are credited.

**This article has been retracted:** Oncotarget has concluded its investigation into this paper following a retraction request from the author Dr. Huidan Deng. The authors lost confidence in the data presented in Figure 1, as it was acquired by outsourcing to a third-party company that is now untraceable and whose data has been reported as untrustworthy. Additionally, they were unable to find the original data for the b-actin image used in Figure 7B of this article, which is the same as the b-actin image in Figure 13A of an earlier 2016 publication from the same group [1].

Dr. Huidan Deng from Sichuan Agricultural University, formally requested the retraction of the manuscript due to these issues and an Editorial decision has been made to retract the article. All co-authors agreed to the retraction, and a signed institutional letter was provided.

Original article: Oncotarget. 2017; 8:114428–114441. <https://doi.org/10.18632/oncotarget.22826>

### REFERENCES

1. Deng H, Kuang P, Cui H, Chen L, Fang J, Zuo Z, Deng J, Wang X, Zhao L. Sodium fluoride induces apoptosis in cultured splenic lymphocytes from mice. Oncotarget. 2016; 7:67880–900. <https://doi.org/10.18632/oncotarget.12081>. [PubMed]
